# Supplementary material for: Safety and Efficacy of Proprotein Convertase Subtilisin-Kexin Type 9 Inhibitors After Acute Coronary Syndrome: A Meta-analysis of Randomized Controlled Trials
Source: Springer Nature journal article supplement (doi:10.1007/s40256-023-00621-5), 2024-01-01
Supplement: MOESM1 [file 26642888]

## Supplementary Information

*American Journal of Cardiovascular Drugs*

### **Safety and efficacy of proprotein convertase subtilisin-kexin type 9 inhibitors after acute coronary syndrome: a meta-analysis of randomized controlled trials.**

Ahmed Atia, Heba Aboeldahab, Ahmed Wageeh, Mohamed Elneny, Mohamed Elmallahy, Bashaer Elawfi, Menna M Aboelkhier, Amr Elrosasy, Maya Magdy Abdelwahab, Somaya Sayed, Ahmed Abdelaziz.

#### **Corresponding Author**

Dr. Ahmed Abdelaziz

Faculty of Medicine, Al-Azhar University, Cairo, Egypt.

E-mail: [ahmedmhmd0144@gmail.com](mailto:ahmedmhmd0144@gmail.com)

ORCID: 0000-0002-1257-3450

Phone: (002) 01110374342

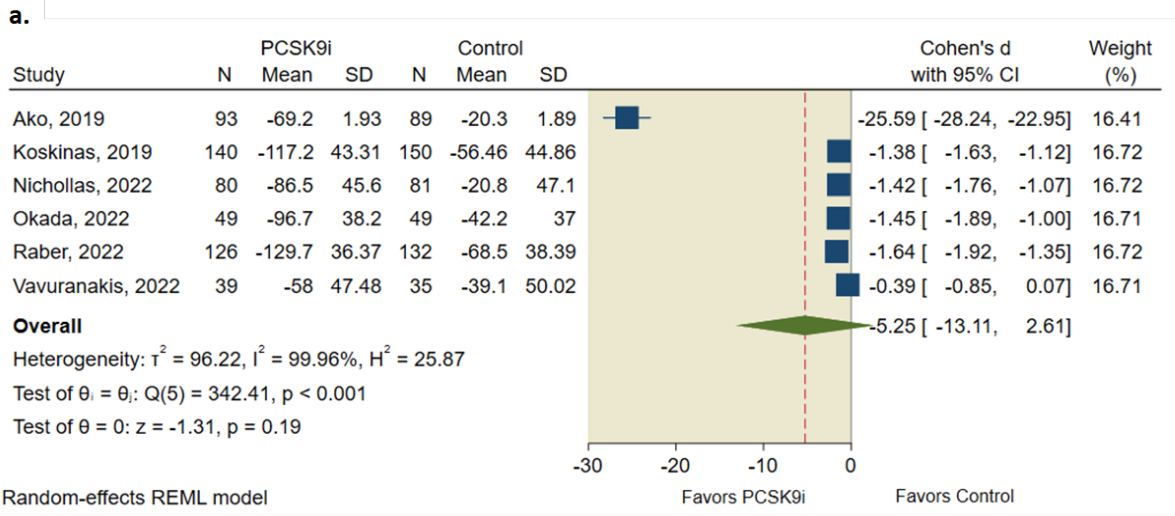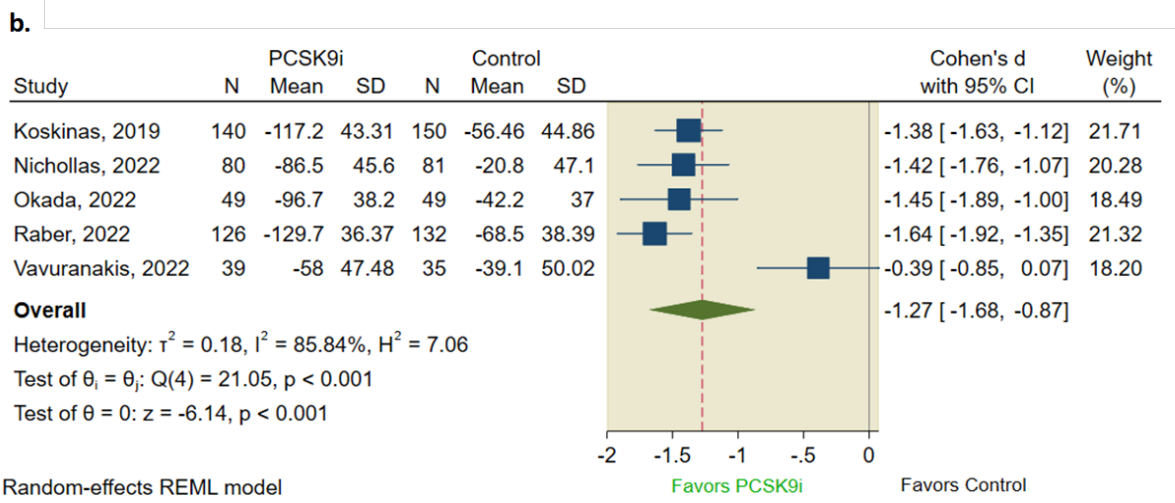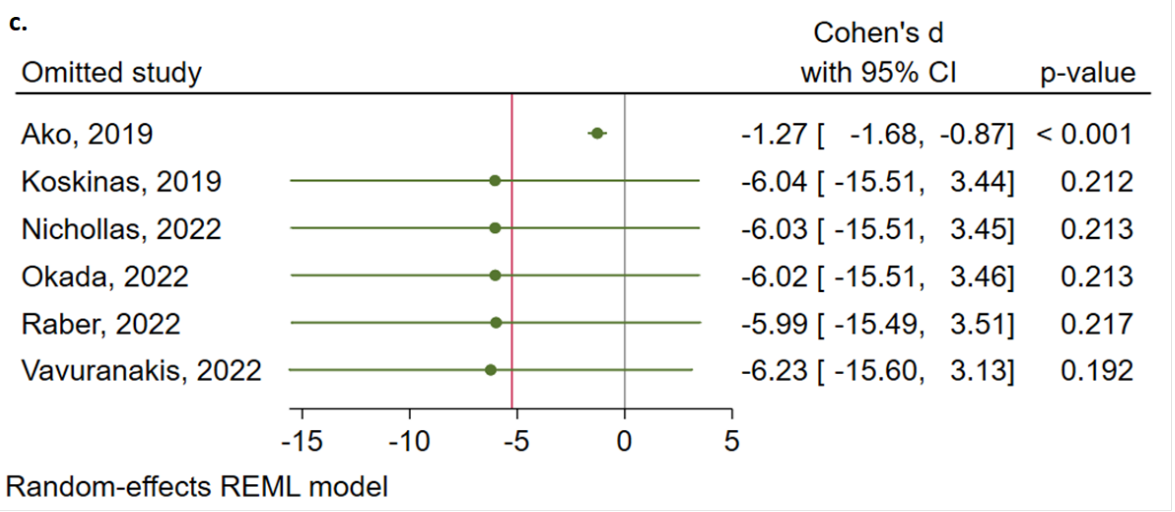

**Supplementary Figure 1:** Forest plots of the Cohen's d with the corresponding 95% confidence interval (CI)

For:

a- non-high-density lipoprotein cholesterol (non-HDL-C) outcome.

b- non-HDL-C sensitivity analysis by excluding Ako 2019.

c- non-HDL-C leave one out.

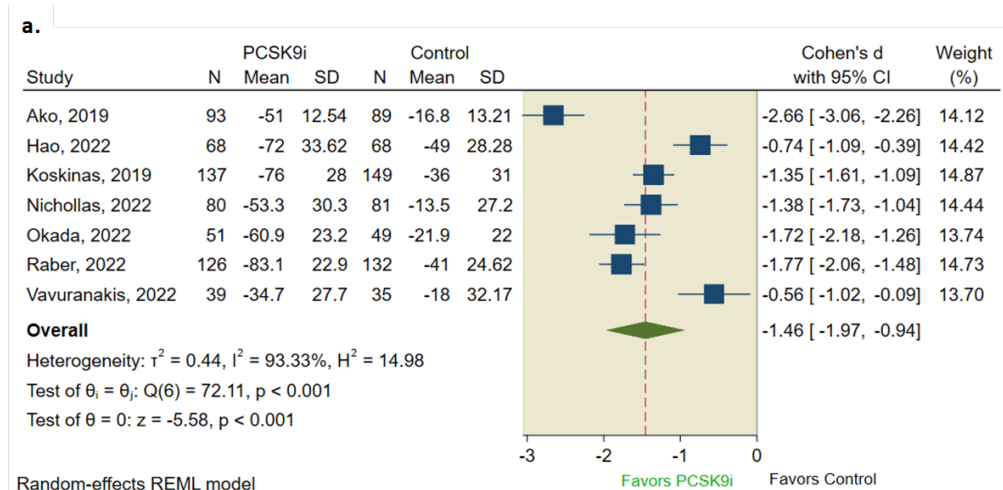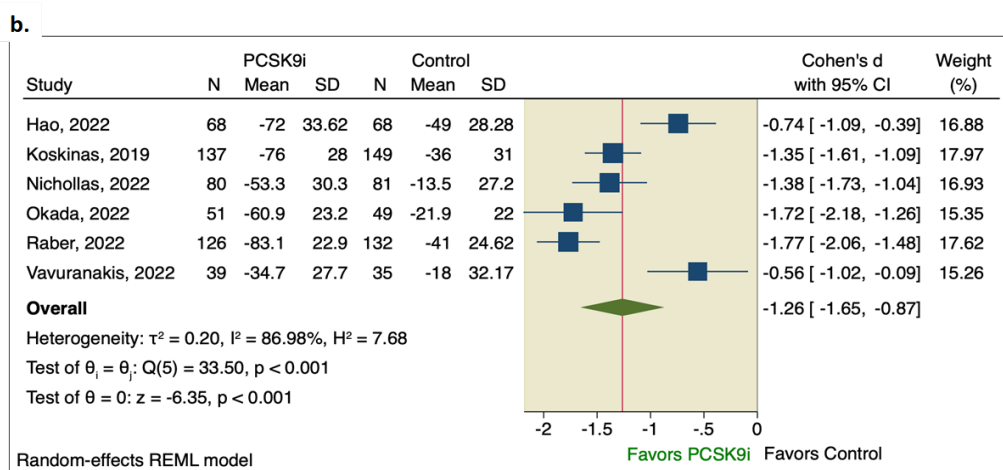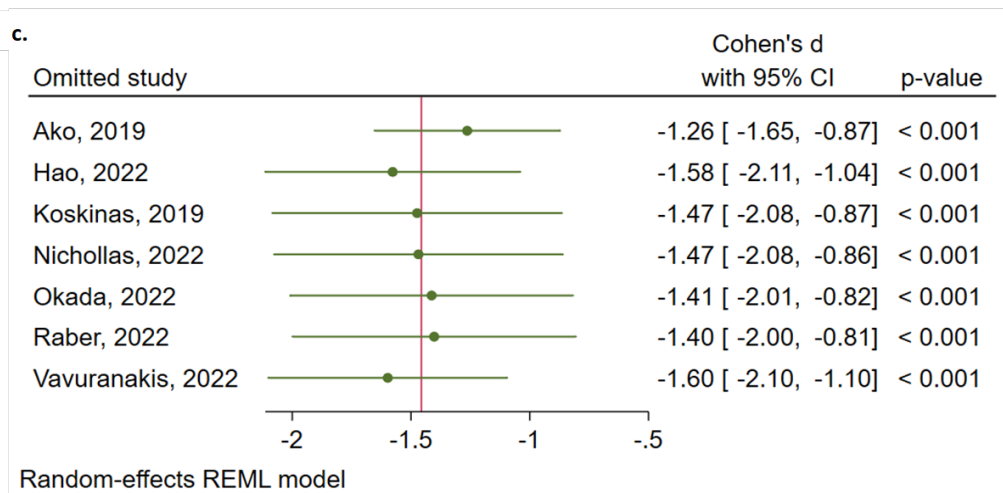

**Supplementary Figure 2.** Forest plots of the Cohen's d with the corresponding 95% confidence interval (CI) For:

- a- Apo-lipoprotein B (Apo-B) outcome,
- b- (Apo-B) sensitivity analysis by excluding Ako 2019.
- c- (Apo-B) Leave one out.

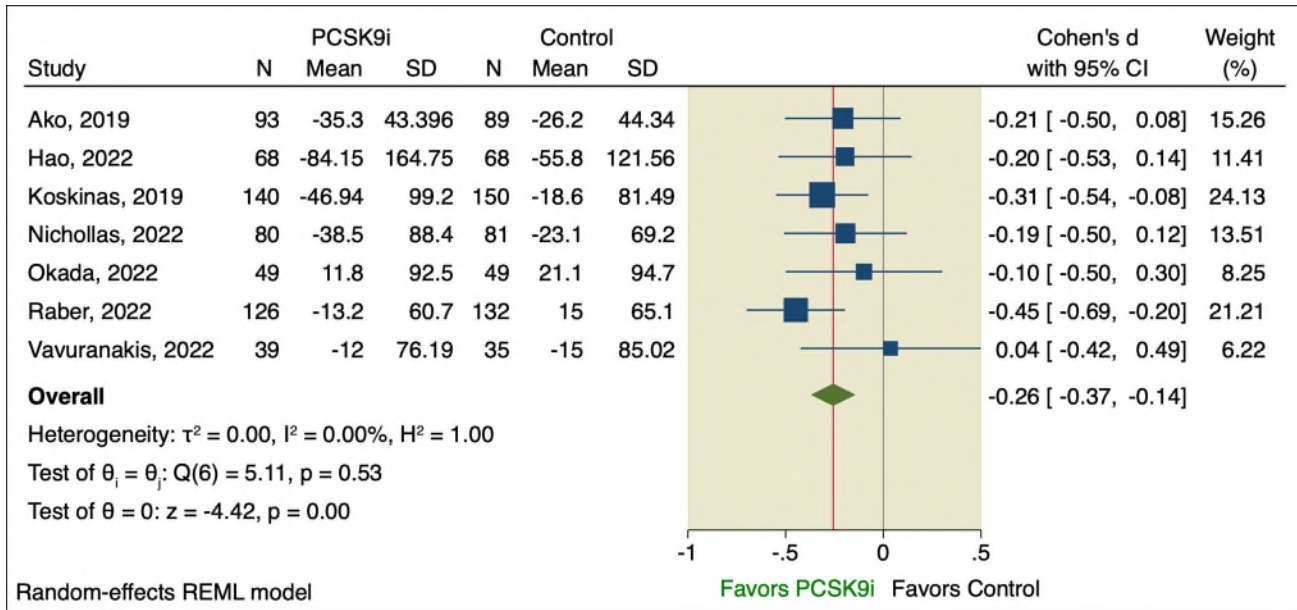

**Supplementary Figure 3:** Forest plot of the Cohen's d with the corresponding 95% confidence interval (CI) For triglycerides (TG).

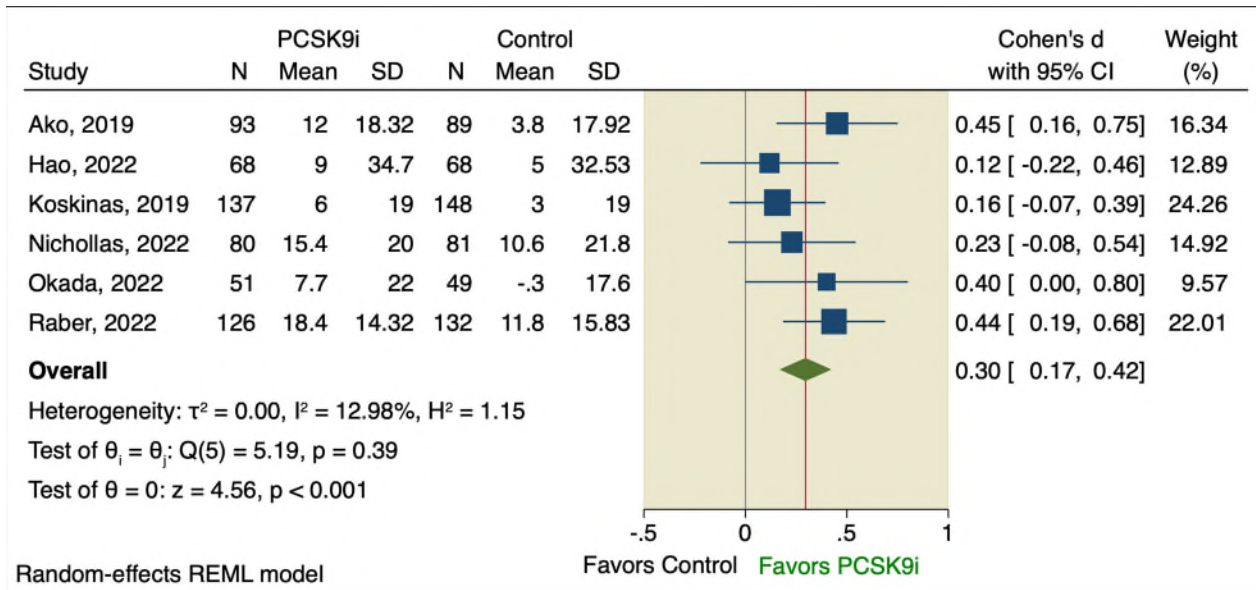

**Supplementary Figure 4:** Forest plot of the Cohen's d with the corresponding 95% confidence interval (CI) For Apo-lipoprotein A1 (Apo-A1).

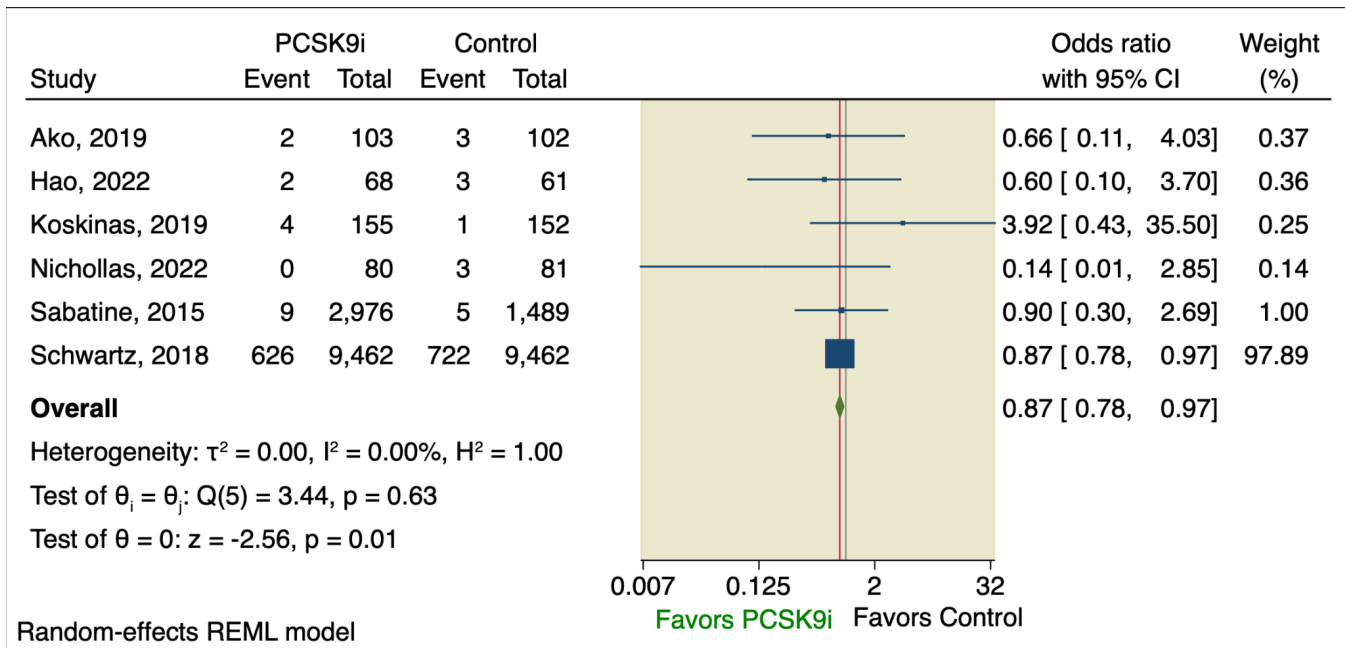

**Supplementary Figure 5:** Forest plot of the Odds Ratio with the corresponding 95% confidence interval (CI) For Myocardial Infarction (MI).

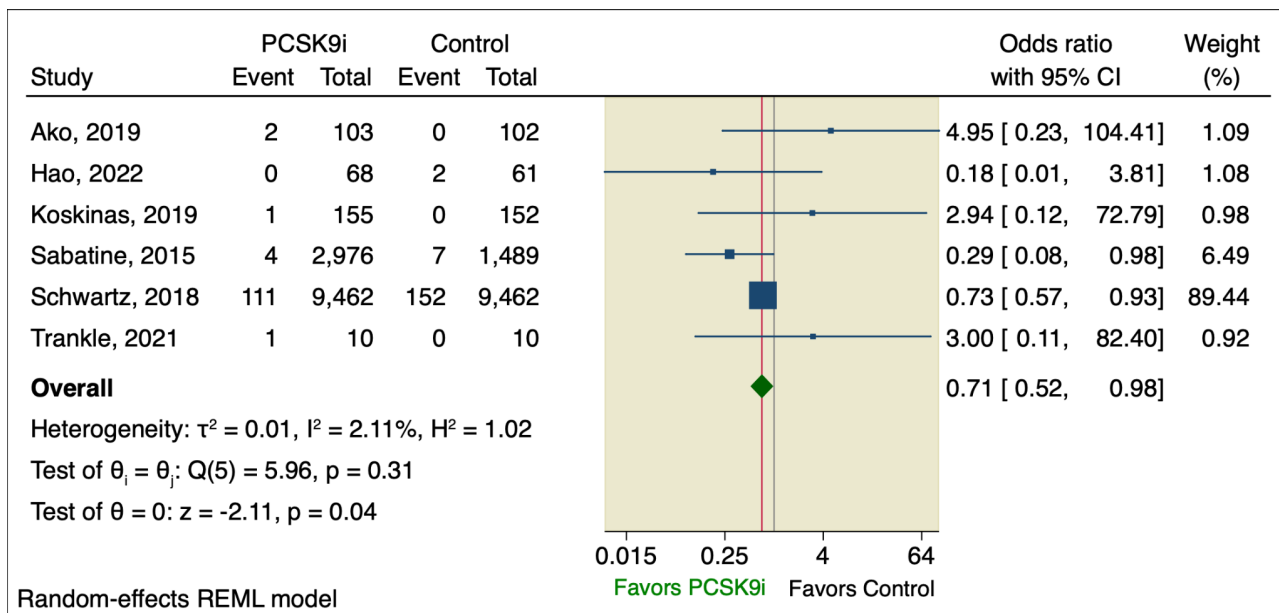

**Supplementary Figure 6:** Forest plot of the Odds Ratio with the corresponding 95% confidence interval (CI) For Cerebrovascular events (stroke/transient ischemic attack (TIA)).

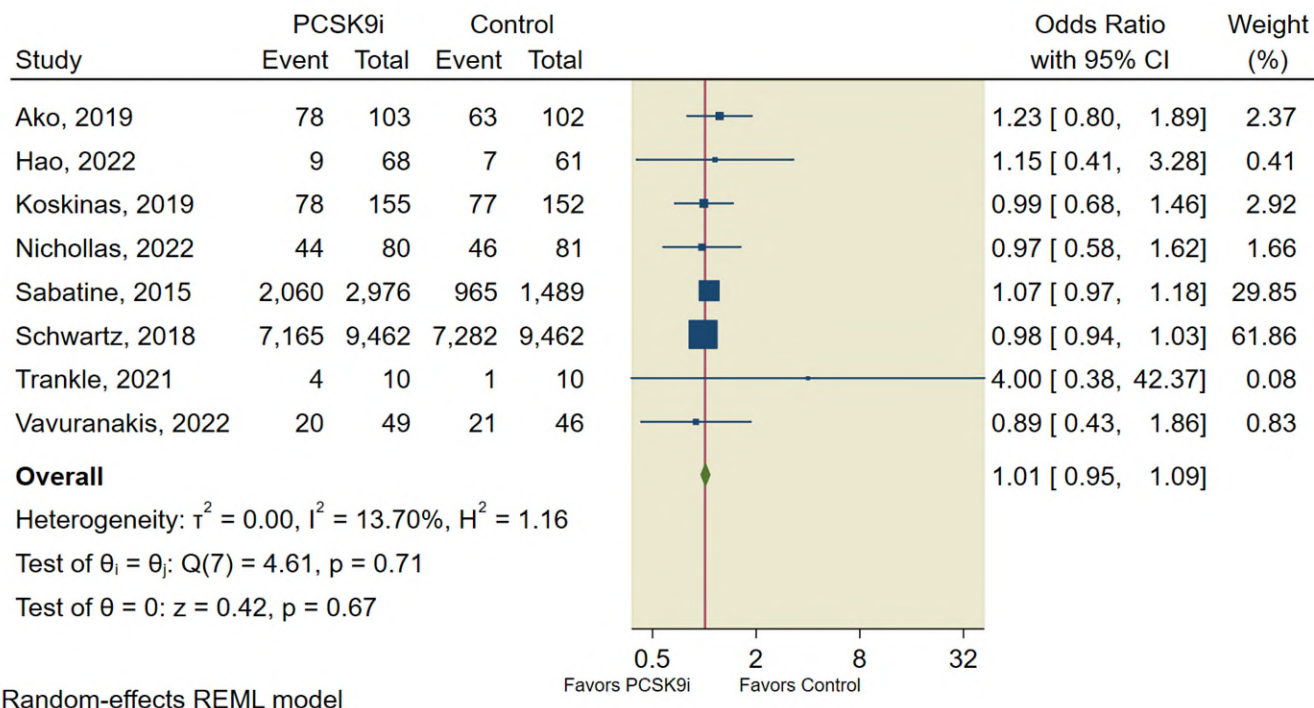

**Supplementary Figure 7:** Forest plot of the Odds Ratio with the corresponding 95% confidence interval (CI)

For any adverse events.

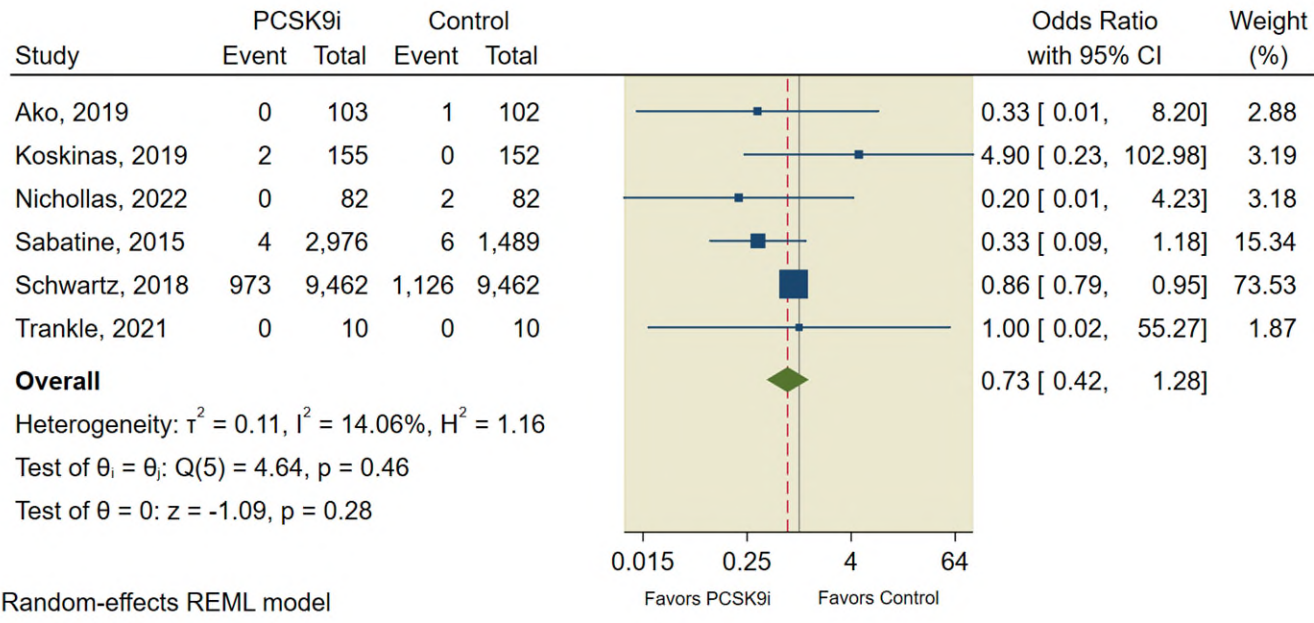

**Supplementary Figure 8:** Forest plot of the Odds Ratio with the corresponding 95% confidence interval (CI)

For the all-cause mortality.

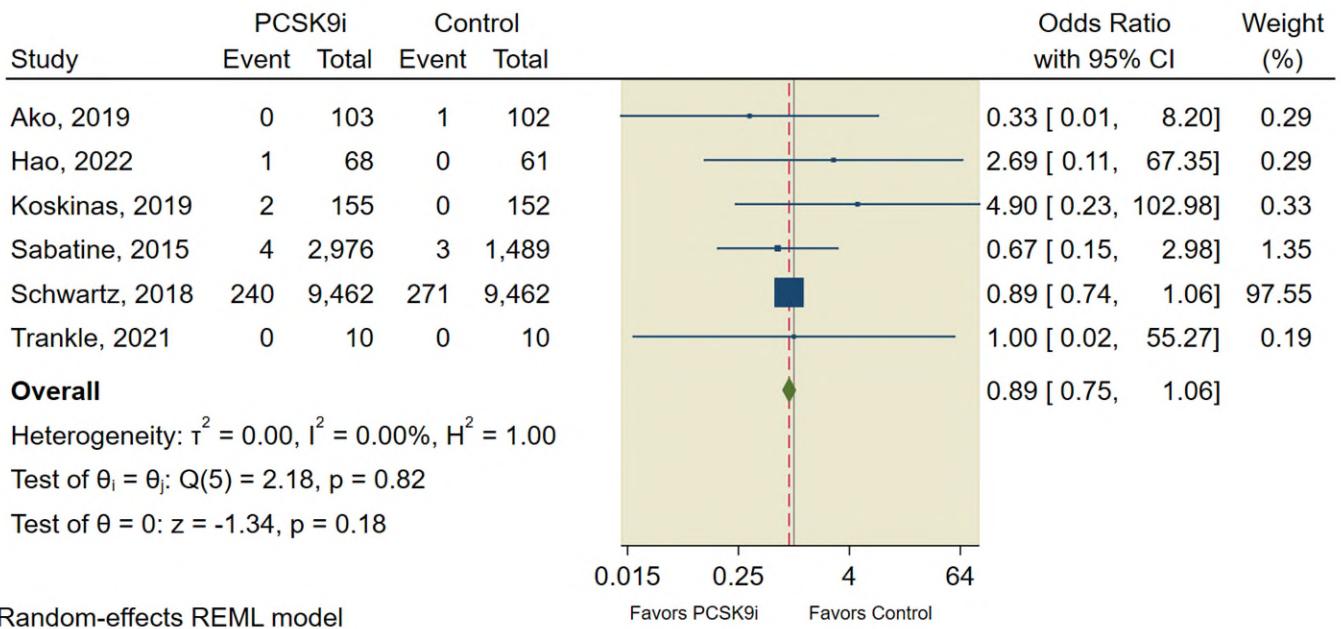

**Supplementary Figure 9:** Forest plot of the Odds Ratio with the corresponding 95% confidence interval (CI) for cardiovascular-specific mortality.

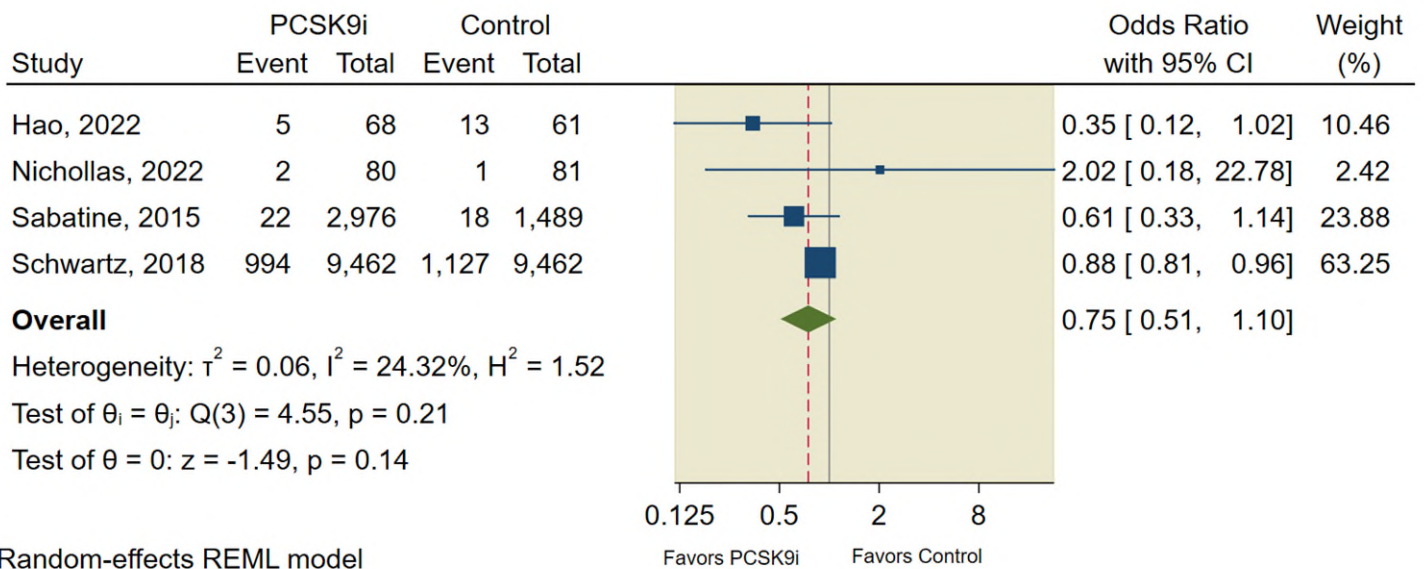

**Supplementary Figure 10:** Forest plot of the Odds Ratio with the corresponding 95% confidence interval (CI) for coronary heart disease.

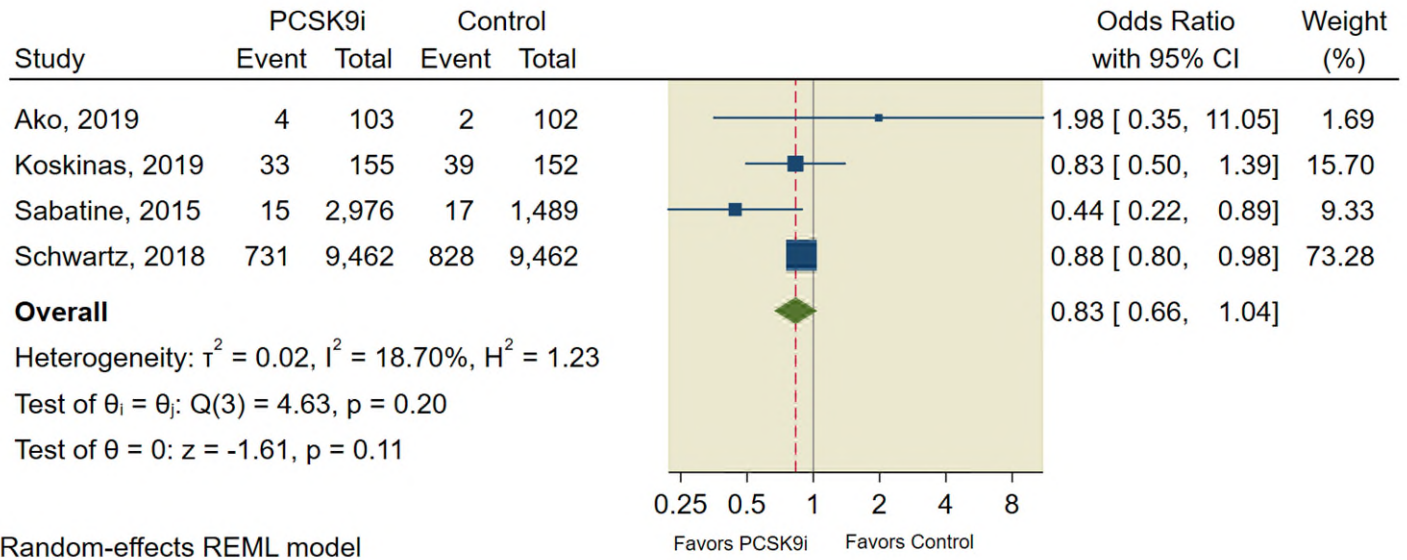

**Supplementary Figure 11:** Forest plot of the Odds Ratio with the corresponding 95% confidence interval (CI) For coronary revascularization outcome.
